# Supplementary material for: p-Type conductivity of hexagonal boron nitride as a dielectrically tunable monolayer: modulation doping with magnesium
Source: Royal Society of Chemistry journal article supplement (doi:10.1039/c7nr08035b), 2018-01-01
Supplement: c7nr08035b1.pdf [file c7nr08035b1.pdf]

Supporting Information for:

## **p-type conductivity of hexagonal boron nitride as dielectrically tunable monolayer: modulation doping with magnesium**

Feipeng Sun<sup>1</sup>, Zhuoran Hao<sup>1</sup>, Guozhen Liu<sup>1</sup>, Chenping Wu<sup>1</sup>, Shengrong Huang<sup>2,\*</sup>, Chuan Liu<sup>3</sup>, Qiming Hong<sup>2</sup>, Xiaohong Chen<sup>1</sup>, Duanjun Cai<sup>\*,1,3</sup> and Junyong Kang<sup>1</sup>

<sup>1</sup>Fujian Key Laboratory of Semiconductor Materials and Applications, CI center for OSED, College of Physical Science and Technology, Xiamen University, Xiamen 361005, China.

<sup>2</sup> Xiamen Top-succeed Electronics Technology Co. Ltd., Xiamen 361022, China.

<sup>3</sup> College of Chemistry and Chemical Engineering, Xiamen University, Xiamen 361005, China.

<sup>4</sup> Department of Chemistry, Duke University, Durham, NC 27708-0354, U.S.A.

\* Corresponding author e-mail: [dcai@xmu.edu.cn](mailto:dcai@xmu.edu.cn)

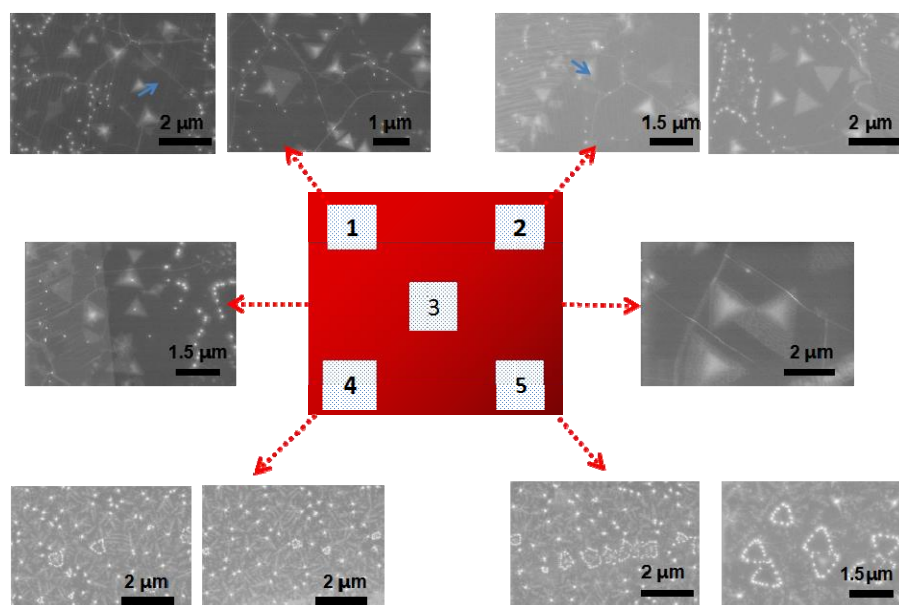

**Fig. S1.** SEM image of h-BN layer in different parts of Cu foil. Five representative places show the uniformity and full coverage of h-BN layer on Cu foil.

\* Corresponding authors' E-mail: [dcai@xmu.edu.cn](mailto:dcai@xmu.edu.cn), Tel: +86-592-2182172,

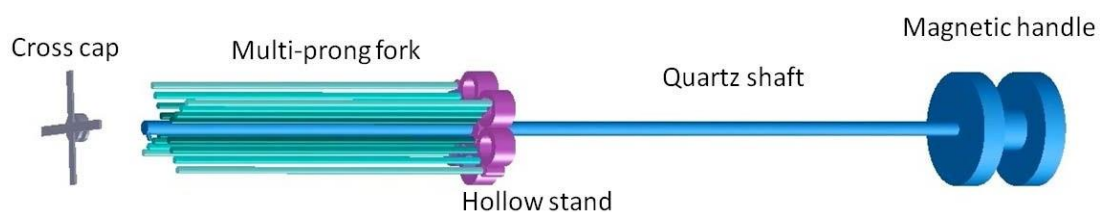

**Fig. S2.** Schematic of multi-prong quartz fork equipped with a magnetic handle and cross cap. The hollow stand is designed for supporting the multi-prong fork and meanwhile, maintaining a fluent gas flow through the wound Cu foil surfaces.

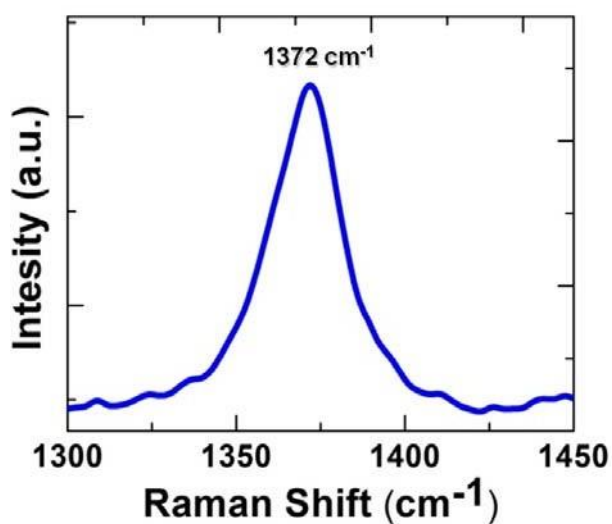

**Fig. S3.** Raman spectrum of monolayer h-BN transferred on SiO<sub>2</sub> substrate.

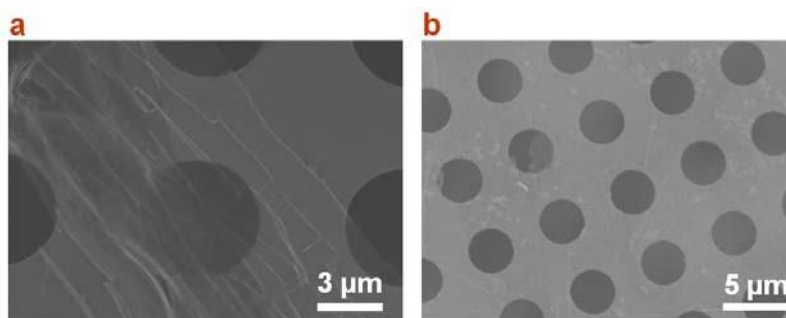

**Fig. S4.** SEM images of transferred h-BN monolayer on TEM grid covered with patterned carbon support film.

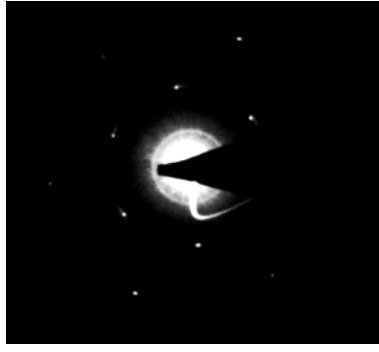

**Fig. S5.** SAED pattern of h-BN monolayer, showing the hexagonal structure and monolayer feature.

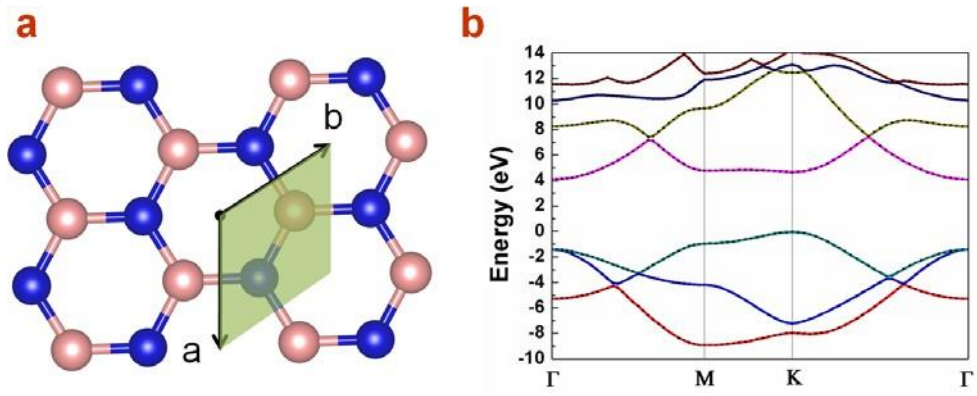

**Fig. S6.** (a) Atomic structure of undoped monolayer h-BN for first-principles calculations and (b) calculated band structure.

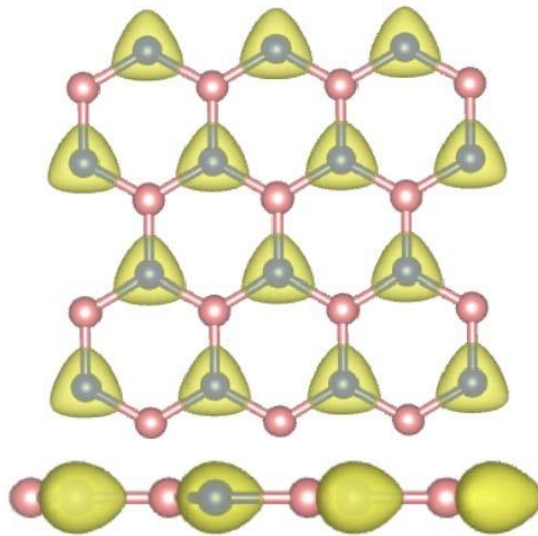

**Fig. S7.** Topview (up) and sideview (down) of charge distribution (VBM) superimposed on h-BN lattice.

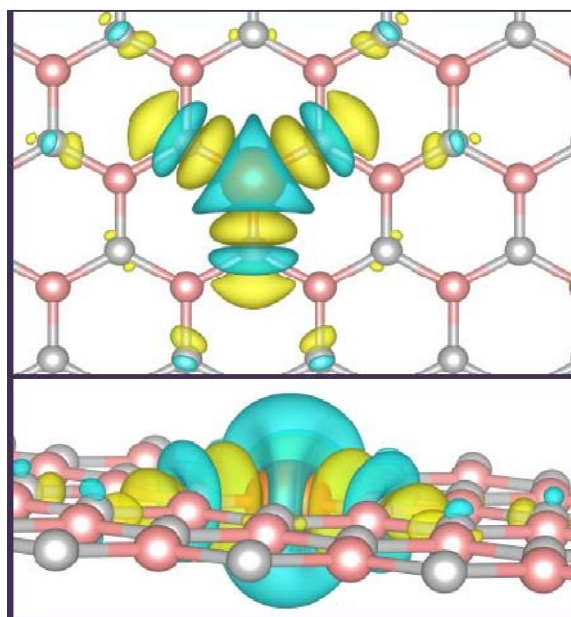

**Fig. S8.** Topview (up) and sideview (down) of differential charge density distribution (VBM) of Mg doped monolayer h-BN by undoped h-BN.

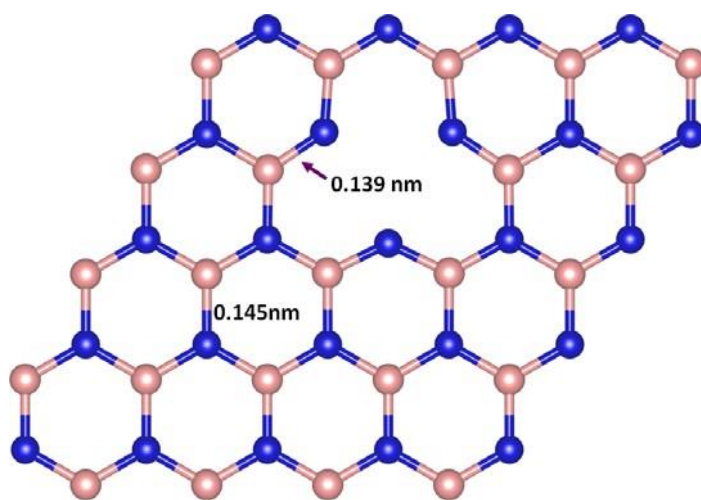

**Fig. S9.** Relaxed atomic structure of h-BN layer with a B vacancy. The bond length of B-N in the vacancy core shrinks to 0.139 nm, less than the original length 0.145 nm.

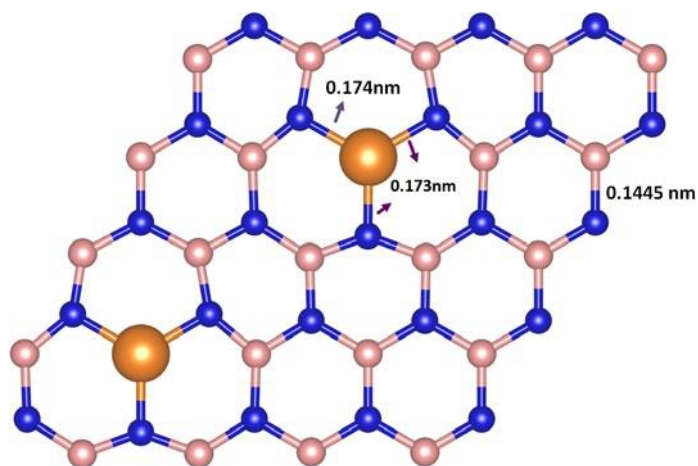

**Fig. S10.** Relaxed atomic structure of h-BN:Mg<sub>2</sub> monolayer (B<sub>Mg2</sub>). The bond length of Mg-N is measured to be 0.174 nm, longer than that of B-N (0.145 nm).

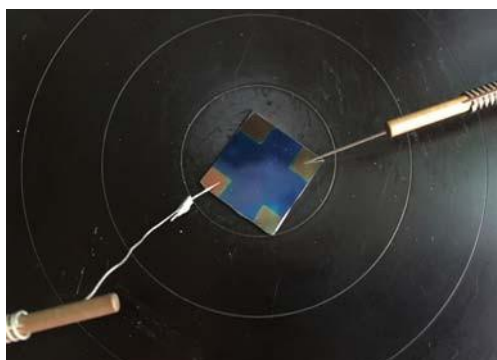

**Fig. S11.** Photograph of electrical measurement for h-BN:Mg sample on probe station.

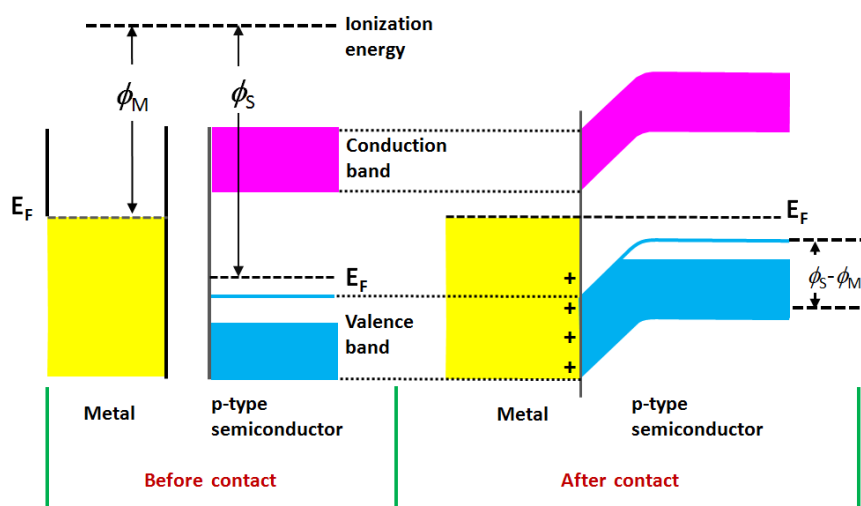

**Fig. S12.** Energy bands configurations of metal and p-type semiconductor before (left) and after (right) contact.

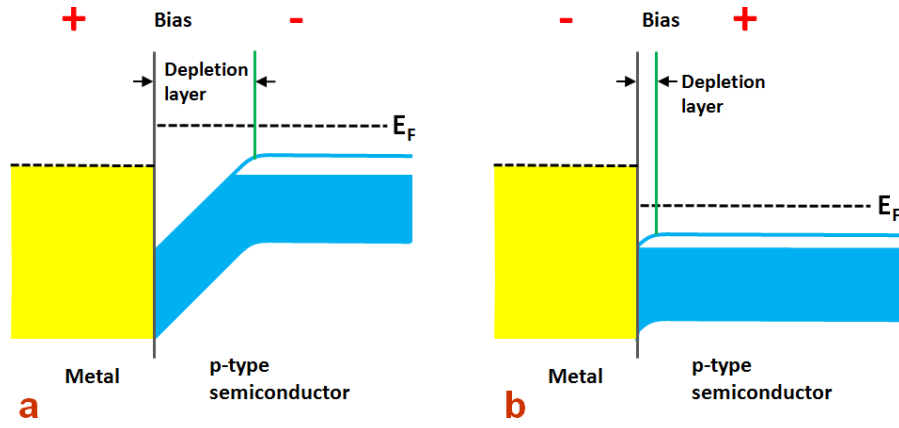

**Fig. S13.** Energy bands configurations of contact of metal and p-type semiconductor with two polarities: (a)  $V_+$  bias and (b)  $V_-$  bias.

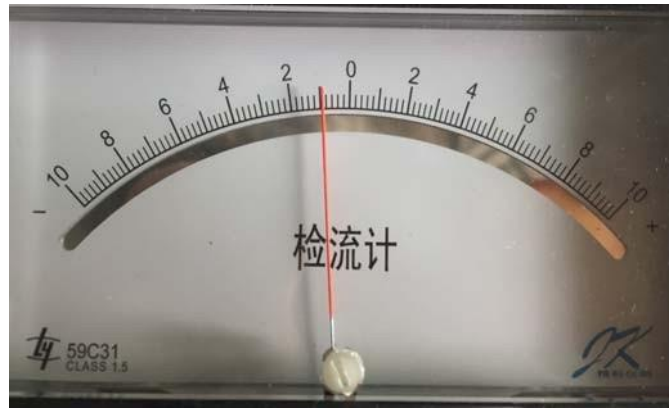

**Fig. S14.** Image of galvanometer when measuring the net current of h-BN:Mg monolayer with single probe rectification method. The negative net current confirms the p-type conductivity of h-BN:Mg.

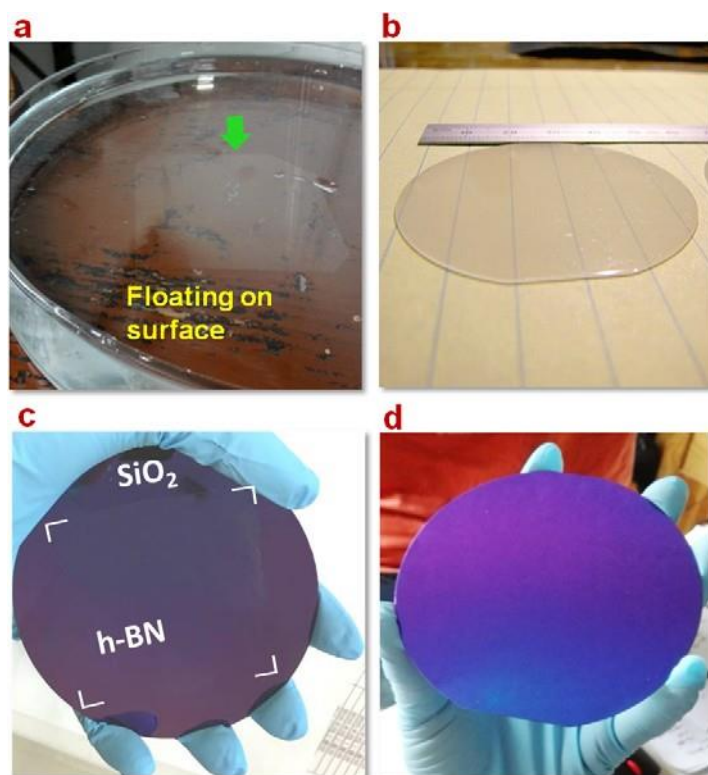

**Fig. S15.** Photographs of large-area h-BN transfer. (a) PMMA protected h-BN film floating on DI water surface, (b) h-BN covered 2" GaN wafer, (c) 4" Si wafer partially covered with h-BN film, and (d) h-BN fully covered 4" Si wafer.

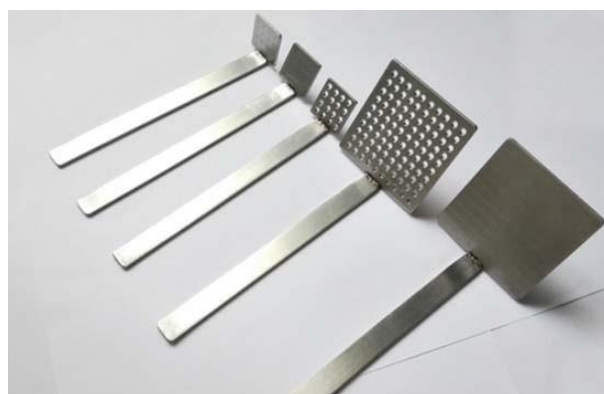

**Fig. S16.** Photograph of a set of home-made spade tools for h-BN film transfer.
